# Supplementary material for: A rare cationic building block that generates a new type of polyhedral network with “cross-linked” pto topology
Source: Royal Society of Chemistry journal article supplement (doi:10.1039/c5cc10203k), 2016-01-01
Supplement: c5cc10203k1.pdf [file c5cc10203k1.pdf]

## Electronic Supplementary Information

### **A rare cationic building block that generates a new type of polyhedral network with “cross-linked” pto topology network.**

Matteo Lusi<sup>a</sup>, Pierre B. A. Fachine<sup>b</sup>, Kai-Jie Chen<sup>a</sup>, John J. Perry IV<sup>a</sup>, and Michael J. Zaworotko<sup>\*a</sup>

*Grupo de Química de Materiais Avançados (GQMAT), Departamento de Química Analítica e Físico-Química, Universidade Federal do Ceará – UFC, Fortaleza-CE, Brazil.*

*Department of Chemical & Environmental Sciences, University of Limerick, Limerick, Republic of Ireland.*

*E-mail: [xtal@ul.edu](mailto:xtal@ul.edu)*

## **Materials and Methods**

All reagents were purchased commercially in analytical grade and employed without further purification. The chemical reagents for this work were all purchased from Sigma Aldrich and include: copper(II) tetrafluoroborate hydrate,  $\text{Cu}(\text{BF}_4)_2 \cdot x\text{H}_2\text{O}$ , ammonium hexafluorostannate,  $(\text{NH}_4)_2\text{SnF}_6$ , ammonium hexafluorogermanate(IV),  $(\text{NH}_4)_2\text{GeF}_6$ , ammonium hexafluorosilicate,  $(\text{NH}_4)_2\text{SiF}_6$ , potassium hexafluorotitanate(IV),  $\text{K}_2\text{TiF}_6$ , potassium hexafluorozirconate,  $\text{K}_2\text{ZrF}_6$ , chloroform ( $\text{CHCl}_3$ ) and methanol ( $\text{CH}_3\text{OH}$ ).

2,4,6-tris(4-pyridyl)pyridine (Tripp) was prepared by the cyclization reaction of 4-acetylpyridine and 4-pyridinecarbaldehyde according to Constable *et al.*<sup>1</sup>

### **Synthesis of Compounds 1-5**

**[Cu<sub>6</sub>(Tripp)<sub>8</sub>(ZrF<sub>6</sub>)<sub>3</sub>]X (1):**  $\text{Cu}(\text{BF}_4)_2 \cdot x\text{H}_2\text{O}$  (2.40 mg, 0.010 mmol) and  $\text{K}_2\text{ZrF}_6$  (2.9 mg, 0.010 mmol) dissolved in 6 mL of chloroform was carefully layered over an solution (6 mL) of Tripp (4.2 mg, 0.013 mmol) in a long thin test tube (h = 15 cm;  $\varnothing$  = 1.5 cm). The tube was sealed with parafilm and left undisturbed at room temperature. After 2-3 weeks, purple single crystals were harvested. FT-IR (solid,  $\nu_{\text{max}}$  in  $\text{cm}^{-1}$ ): 3410, 3251, 3106, 1596, 1636, 1561, 1536, 1501, 1436, 1403, 1326, 1265, 1225, 1095, 1067, 1033, 1006, 988, 899, 821, 716.

**[Cu<sub>6</sub>(Tripp)<sub>8</sub>(SnF<sub>6</sub>)<sub>3</sub>]X (2):** Crystals of **2** were prepared in a similar manner as **1**, except that  $(\text{NH}_4)_2\text{SnF}_6$  (2.7 mg, 0.010 mmol) was used instead of  $\text{K}_2\text{ZrF}_6$ . After 2-3 weeks, purple single crystals were harvested. FT-IR (solid,  $\nu_{\text{max}}$  in  $\text{cm}^{-1}$ ): 3400, 3311, 3108, 1637, 1597, 1559, 1538, 1505, 1436, 1402, 1324, 1270, 1222, 1133, 1100, 1066, 1032, 1006, 988, 823, 717, 693, 667.

**[Cu<sub>6</sub>(Tripp)<sub>8</sub>(GeF<sub>6</sub>)<sub>3</sub>]X (3):** Crystals of **3** were prepared in a manner similar to **1**, except that  $(\text{NH}_4)_2\text{GeF}_6$  (2.25 mg, 0.010 mmol) was used instead of  $\text{K}_2\text{ZrF}_6$ . After 2-3 weeks, purple single crystals were harvested. FT-IR (solid,  $\nu_{\text{max}}$  in  $\text{cm}^{-1}$ ): 3390, 3252, 3106, 1635, 1618, 1597, 1560, 1538, 1505, 1436, 1325, 1268, 1223, 1094, 1065, 1033, 1009, 989, 898, 873, 822, 713, 667.

**[Cu<sub>6</sub>(Tripp)<sub>8</sub>(TiF<sub>6</sub>)<sub>3</sub>]X (4):** Crystals of **4** were prepared in the same way as **1** except that  $\text{K}_2\text{TiF}_6$  (2.43 mg, 0.010 mmol) was used instead of  $\text{K}_2\text{ZrF}_6$ . After 2-3 weeks, purple single crystals were harvested. FT-IR (solid,  $\nu_{\text{max}}$  in  $\text{cm}^{-1}$ ): 3407, 3248, 3106, 1637, 1618, 1597, 1560, 1538, 1505, 1436, 1402, 1324, 1267, 1223, 1065, 1033, 1007, 900, 821, 718, 668.

**[Cu<sub>6</sub>(Tripp)<sub>8</sub>(SiF<sub>6</sub>)<sub>3</sub>]X (5):** Crystals of **5** were prepared in the same way as **1** except that  $(\text{NH}_4)_2\text{SiF}_6$  (1.8mg, 0.010 mmol) was used instead of  $\text{K}_2\text{ZrF}_6$ . After 2-3 weeks, purple single crystals were harvested. FT-IR (solid,  $\nu_{\text{max}}$  in  $\text{cm}^{-1}$ ): 3386, 3245, 3104, 1637, 1616, 1596, 1561, 1538, 1507, 1435, 1400, 1320, 1221, 1134, 1096, 1064, 1031, 1009, 898, 821, 693, 669.

## Single Crystal X-Ray Diffraction

SCXRD data were collected at 100 K on a Bruker D8 Quest diffractometer equipped with Cu $\alpha$  microfocus X-ray generator, Photon 100 detector and Oxford Cryosystem 700 series. The data were integrated, and empirically corrected for X-ray absorption with Sadabs,<sup>2</sup> in the Bruker APEX II software suite. The structures were solved by direct methods and refined against  $F_o$ , with the ShelX software<sup>2</sup> interfaced by X-Seed.<sup>3</sup>

**Table 1:** Summary of Crystallographic data for crystals **1** to **5**.

|                                                     | Tripp-Cu-ZRFSIX (1)                                                                               | Tripp-Cu-SNFSIX (2)                                                                               | Tripp-Cu-GEFSIX (3)                                                                               | Tripp-Cu-TIFSIX (4)                                                                               | Tripp-Cu-SIFSIX (5)                                                                               |
|-----------------------------------------------------|---------------------------------------------------------------------------------------------------|---------------------------------------------------------------------------------------------------|---------------------------------------------------------------------------------------------------|---------------------------------------------------------------------------------------------------|---------------------------------------------------------------------------------------------------|
| Formula*                                            | C <sub>160</sub> H <sub>112</sub> Cu <sub>6</sub> F <sub>18</sub> Zr <sub>3</sub> N <sub>32</sub> | C <sub>160</sub> H <sub>112</sub> Cu <sub>6</sub> F <sub>18</sub> Sn <sub>3</sub> N <sub>32</sub> | C <sub>160</sub> H <sub>112</sub> Cu <sub>6</sub> F <sub>18</sub> Ge <sub>3</sub> N <sub>32</sub> | C <sub>160</sub> H <sub>112</sub> Cu <sub>6</sub> F <sub>18</sub> Ti <sub>3</sub> N <sub>32</sub> | C <sub>160</sub> H <sub>112</sub> Cu <sub>6</sub> F <sub>18</sub> Si <sub>3</sub> N <sub>32</sub> |
| Formula weight* /g                                  | 3479.71                                                                                           | 3562.12                                                                                           | 3423.82                                                                                           | 3349.75                                                                                           | 3290.32                                                                                           |
| Temp. /K                                            | 100(2)                                                                                            | 100(2)                                                                                            | 100(2)                                                                                            | 100(2)                                                                                            | 100(2)                                                                                            |
| Cryst. system                                       | cubic                                                                                             | cubic                                                                                             | cubic                                                                                             | cubic                                                                                             | cubic                                                                                             |
| Space group                                         | <i>Pm</i> -3                                                                                      |
| <i>a</i> , <i>b</i> , <i>c</i> /Å                   | 21.165(2)                                                                                         | 21.2379(10)                                                                                       | 21.2111(8)                                                                                        | 21.2174(8)                                                                                        | 21.1882(4)                                                                                        |
| $\alpha$ , $\beta$ , $\gamma$ /°                    | 90                                                                                                | 90                                                                                                | 90                                                                                                | 90                                                                                                | 90                                                                                                |
| <i>V</i> /Å <sup>3</sup>                            | 9481(3)                                                                                           | 9579.3(14)                                                                                        | 9543.1(11)                                                                                        | 9551.6(11)                                                                                        | 9512.2(5)                                                                                         |
| <i>Z</i> '                                          | 1/24                                                                                              | 1/24                                                                                              | 1/24                                                                                              | 1/24                                                                                              | 1/24                                                                                              |
| <i>D</i> <sub>c</sub> * /g cm <sup>-3</sup>         | 0.609                                                                                             | 0.617                                                                                             | 0.596                                                                                             | 0.582                                                                                             | 0.574                                                                                             |
| reflns coll.                                        | 17481                                                                                             | 23379                                                                                             | 52384                                                                                             | 13544                                                                                             | 37996                                                                                             |
| unique reflns                                       | 1090                                                                                              | 2542                                                                                              | 1867                                                                                              | 1796                                                                                              | 1866                                                                                              |
| <i>R</i> <sub>int</sub>                             | 0.2043                                                                                            | 0.1930                                                                                            | 0.1026                                                                                            | 0.0968                                                                                            | 0.1166                                                                                            |
| <i>R</i> <sub>1</sub> [ <i>I</i> > 2σ( <i>I</i> )]  | 0.2289                                                                                            | 0.1508                                                                                            | 0.1513                                                                                            | 0.1732                                                                                            | 0.1621                                                                                            |
| <i>wR</i> <sub>2</sub> [ <i>I</i> > 2σ( <i>I</i> )] | 0.4225                                                                                            | 0.3811                                                                                            | 0.4423                                                                                            | 0.4334                                                                                            | 0.3851                                                                                            |
| <i>R</i> <sub>1</sub> (all data)                    | 0.2351                                                                                            | 0.1653                                                                                            | 0.1590                                                                                            | 0.2601                                                                                            | 0.1719                                                                                            |
| <i>wR</i> <sub>2</sub> (all data)                   | 0.5336                                                                                            | 0.4436                                                                                            | 0.4511                                                                                            | 0.4642                                                                                            | 0.4090                                                                                            |
| GOF                                                 | 2.388                                                                                             | 1.195                                                                                             | 2.098                                                                                             | 1.490                                                                                             | 1.060                                                                                             |

\* the reported values are based on the assigned electron density only.

## Powder X-ray Diffraction

PXRD patterns were collected on a Panalytical Empyrean diffractometer at 40 kV, 40 mA for  $\text{Cu}_\alpha$  ( $\lambda = 1.5418 \text{ \AA}$ ), equipped with a X'cellerator detector. The measurement was performed at room temperature with a scan speed of 0.5 s/step ( $6^\circ/\text{min}$ ) and a step size of  $0.05^\circ$  in  $2\theta$ . Graphics were generated in the Panalytical X'Pert Highscore Plus v 3.0 for Windows.

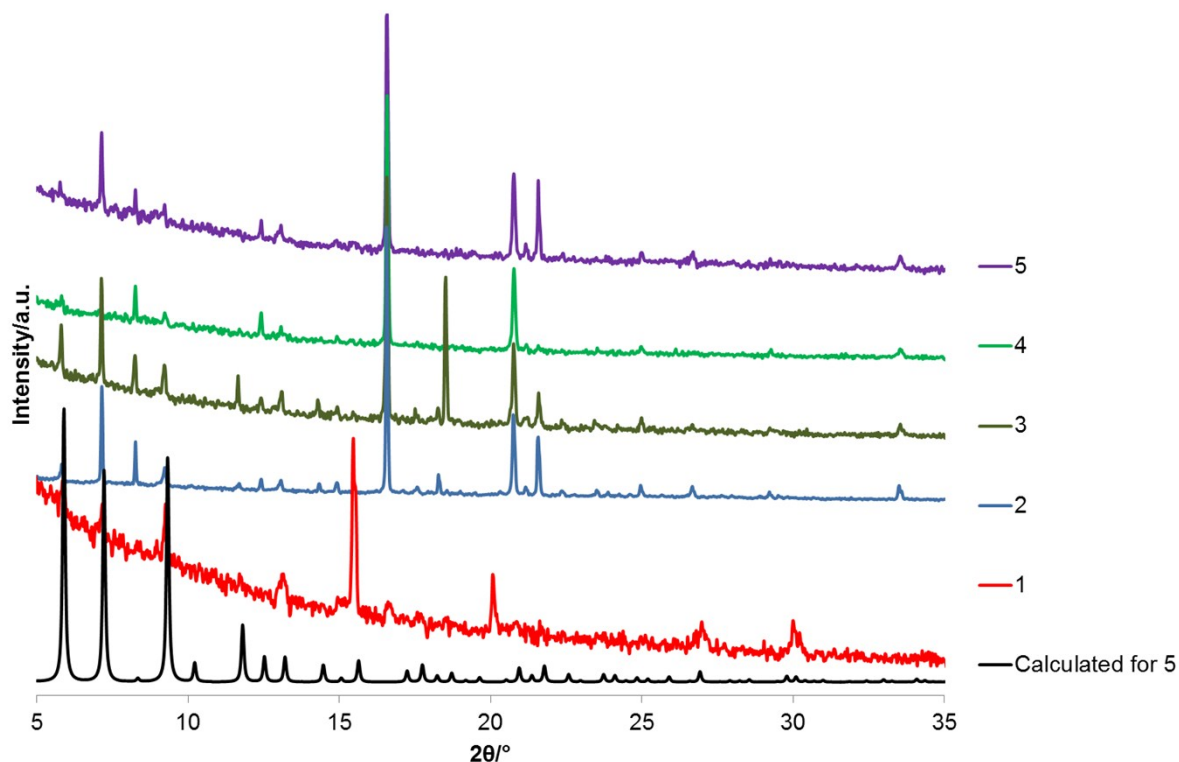

**Figure S1:** Comparison of PXRD patterns: calculated for **5** (black) and the experimental ones for **1** (red), **2** (blue), **3** (dark green), **4** (light green) and **5** (purple).

## Infrared Spectroscopy

IR spectra were carried out on a PerkinElmer Spectrum 100 FT-IR Spectrometer with a Universal ATR sampling accessory. The spectra were recorded in the wave number region of  $4000\text{--}650 \text{ cm}^{-1}$  and with a resolution setting of 2 and 16 scans per sample.

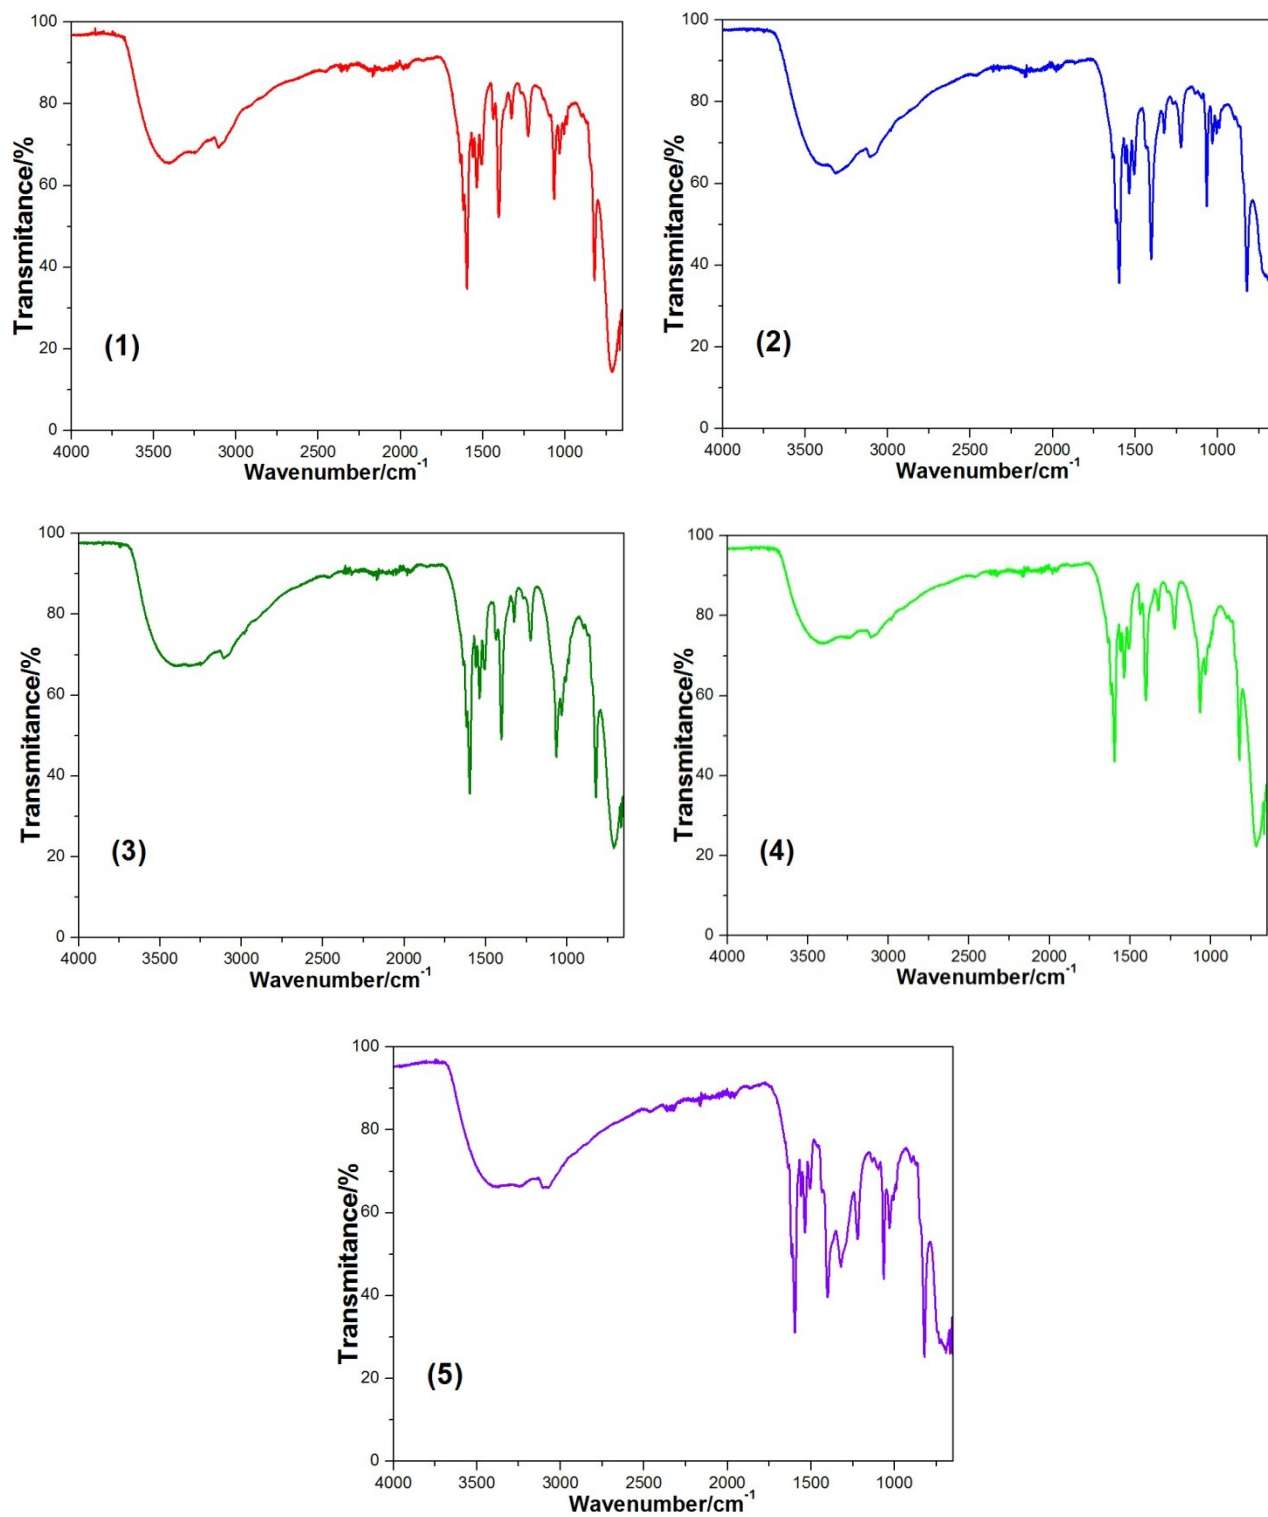

Figure S2: FT-IR of the samples 1, 2, 3, 4 and 5.

## Thermogravimetric analysis

TGA was performed under 50 ml/L stream of nitrogen on a TA Instrument Q50 from 30 °C to 500 °C at the heating rate of 10 °C/min.

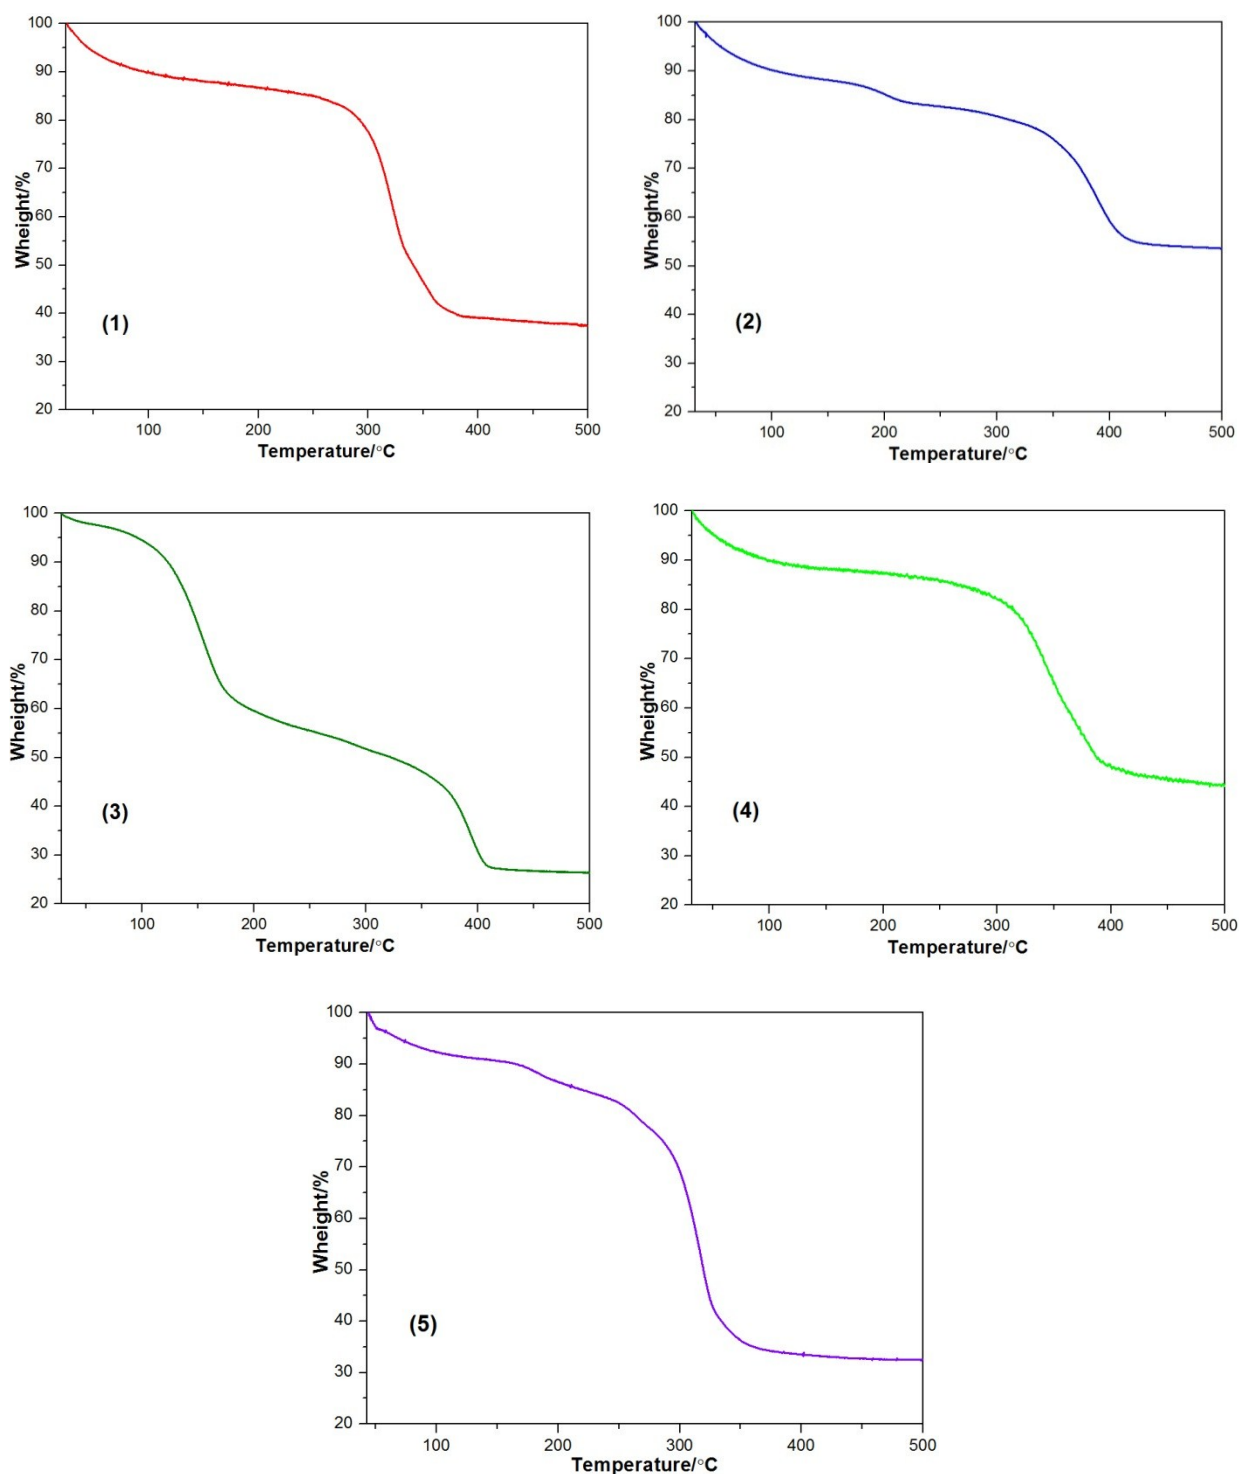

Figure S3: Thermogravimetric analysis of 1, 2, 3, 4 and 5.

## Electron Microscopy

Photomicrographs of the single crystals surface were obtained by scanning electron microscopy (SEM) on a Hitachi SU-70 with a thermal field emission source and operating voltage of 20 kV in samples covered with a gold layer (Sputter coater: 20 mA, Emitech K550). The chemical composition was performed using an X-ray detector (model XMax, Oxford instruments) for energy-dispersive X-ray spectroscopy (EDX).

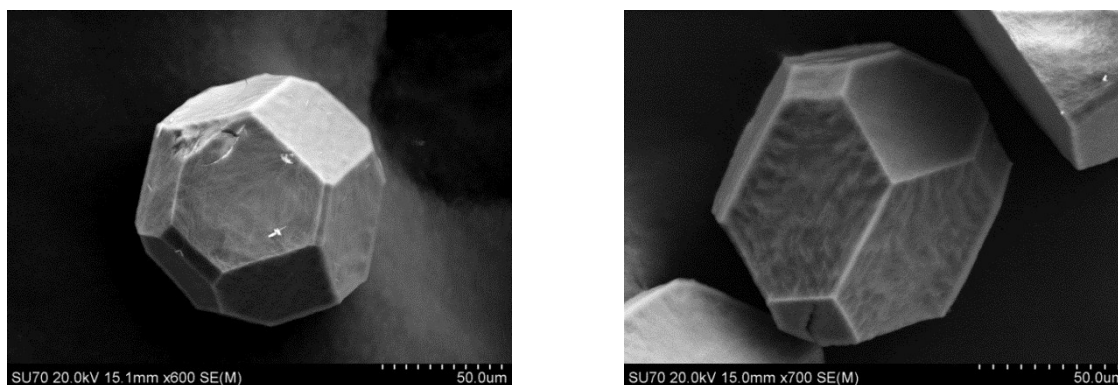

Figure S4: SEM images of  $[\text{Cu}_6(\text{Tripp})_8(\text{SiF}_6)_3]\text{X}$  (5) single crystals.

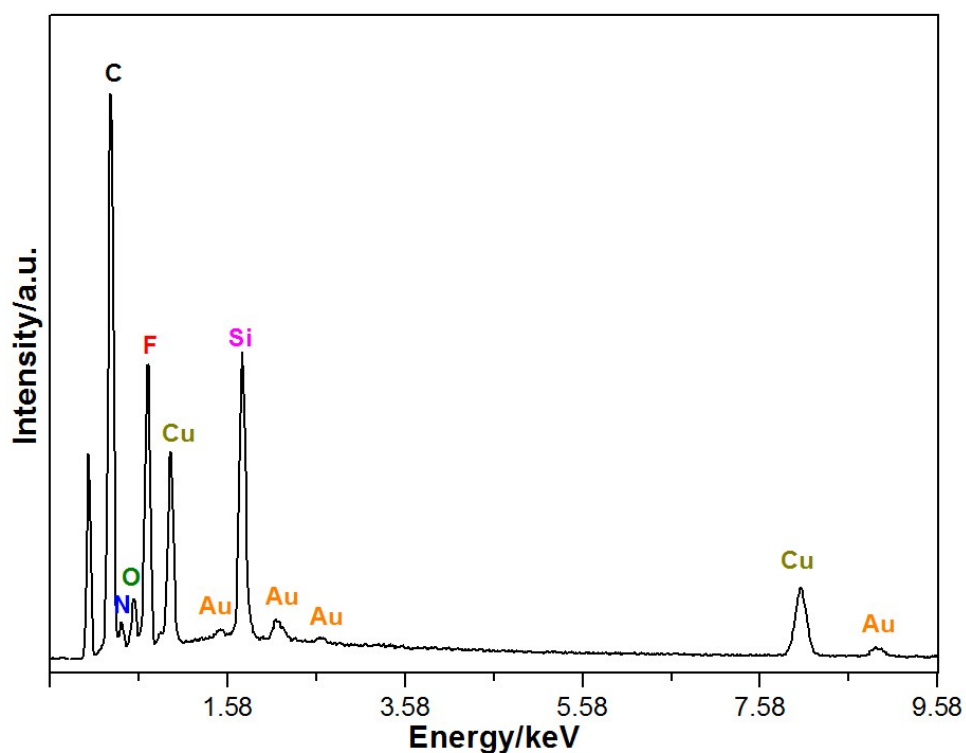

Figure S5: EDX spectroscopy of  $[\text{Cu}_6(\text{Tripp})_8(\text{SiF}_6)_3]\text{X}$  single crystals.

**Table 2:** EDX analysis for 5.

|                         | <b>C</b>      | <b>N</b>     | <b>O</b>     | <b>F</b>     | <b>Si</b>   | <b>Cu</b>   |
|-------------------------|---------------|--------------|--------------|--------------|-------------|-------------|
| point a*                | 46.85         | 11.86        | 5.09         | 23.40        | 3.94        | 7.84        |
| point b*                | 44.90         | 9.33         | 6.02         | 24.62        | 4.80        | 8.97        |
| point c*                | 43.30         | 10.91        | 8.11         | 23.16        | 4.34        | 8.75        |
| point d*                | 44.64         | 10.88        | 6.46         | 25.95        | 4.20        | 6.82        |
| avg                     | 44.92         | 10.75        | 6.42         | 24.28        | 4.32        | 8.10        |
| std                     | 1.27          | 0.91         | 1.09         | 1.11         | 0.31        | 0.85        |
| weight (g/mol)          | 12.01         | 14.01        | 15.99        | 19.00        | 28.08       | 63.55       |
| <b>ratio observed</b>   | <b>176.21</b> | <b>36.13</b> | <b>18.91</b> | <b>60.21</b> | <b>7.25</b> | <b>6.00</b> |
| std                     | 4.97          | 3.05         | 3.22         | 2.75         | 0.52        | 0.63        |
| <b>ratio calculated</b> | <b>160.00</b> | <b>32.00</b> | <b>0.00</b>  | <b>18.00</b> | <b>3.00</b> | <b>6.00</b> |

\* Weight percentage was calculated from the sum of the reported elements plus gold ( $\approx 1\%$ ).

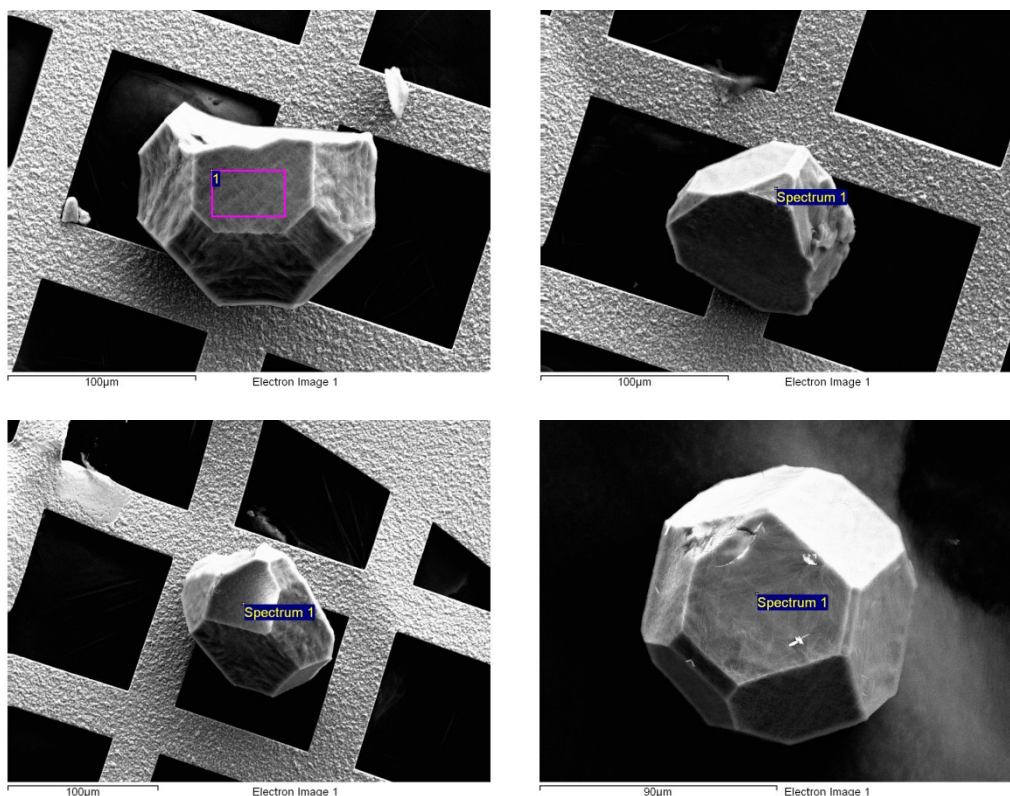

**Figure S6:** SEM images of the EDX targets. From the top left, clockwise point a, b, c and d respectively.

### **Brunauer–Emmett–Teller (BET) Surface area**

77K N<sub>2</sub> sorption isotherm was measured using Micromeritics Tristar II 3030 surface characterization analyzer. Before the measurement, the chloroform-exchanged sample was



desolvated under high vacuum at room temperature for 16 h to remove the chloroform molecules in the pores.

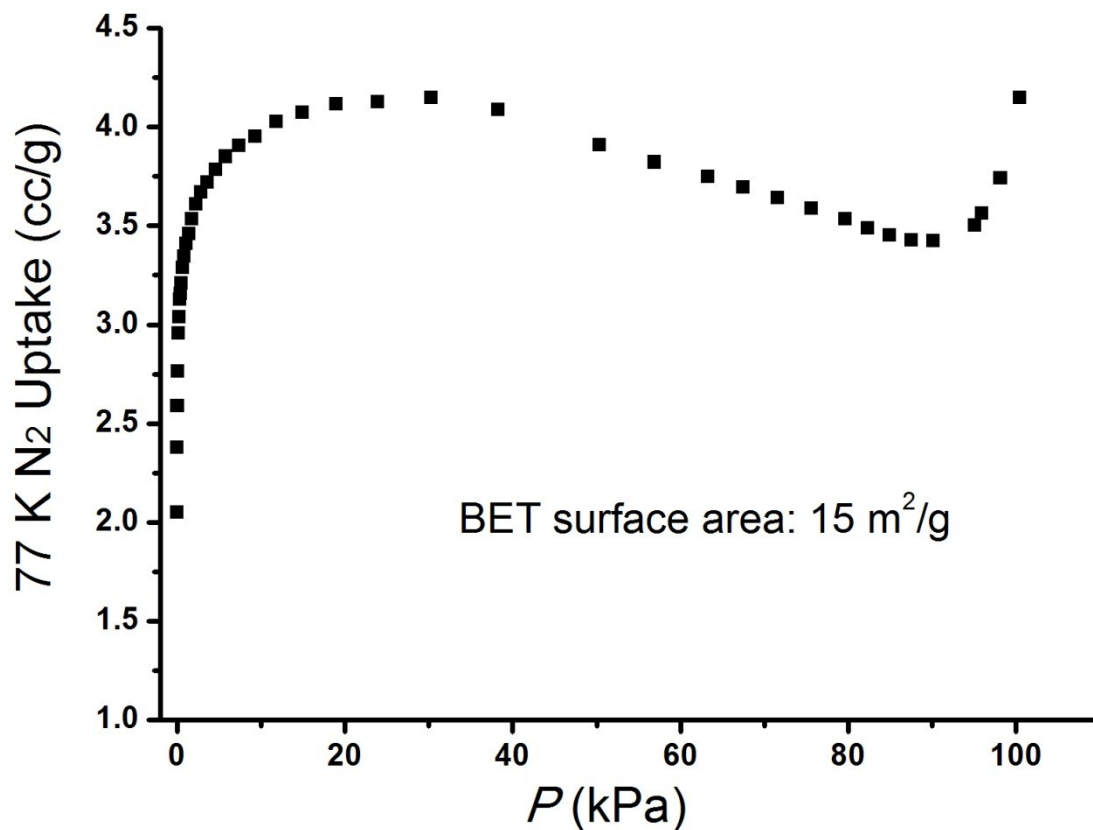

Figure S7: BET measurement of **4**.

#### Additional References

1. E. C. Constable, G. Zhang, C. E. Housecroft and J. A. Zampese, *CrystEngComm*, 2011, **13**, 6864-6870.
2. G. Sheldrick, *Acta Crystallogr. Sect. A: Found. Crystallogr.*, 2008, **64**, 112-122.
3. L. J. Barbour, *Journal of Supramolecular Chemistry*, 2001, **1**, 189-191.
